# Supplementary material
Source: Springer Nature journal article supplement (https://www.springermedizin.de/resource/supplementary/13075_2010_9733_MOESM3_ESM.pdf/9693608)

**A**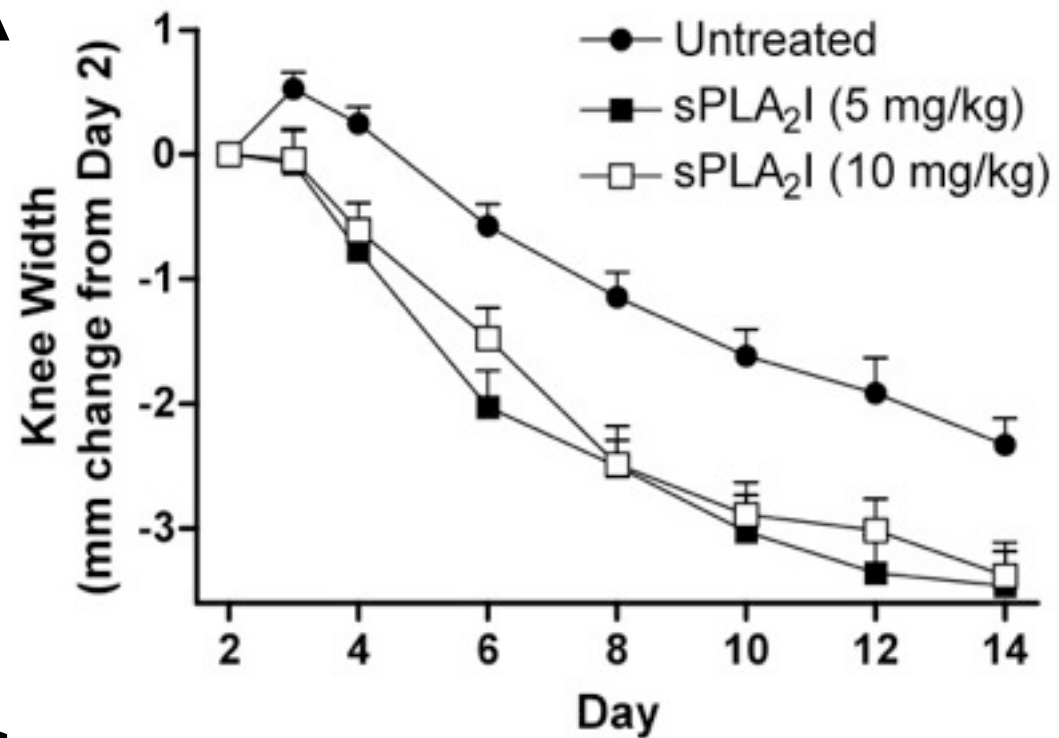**B**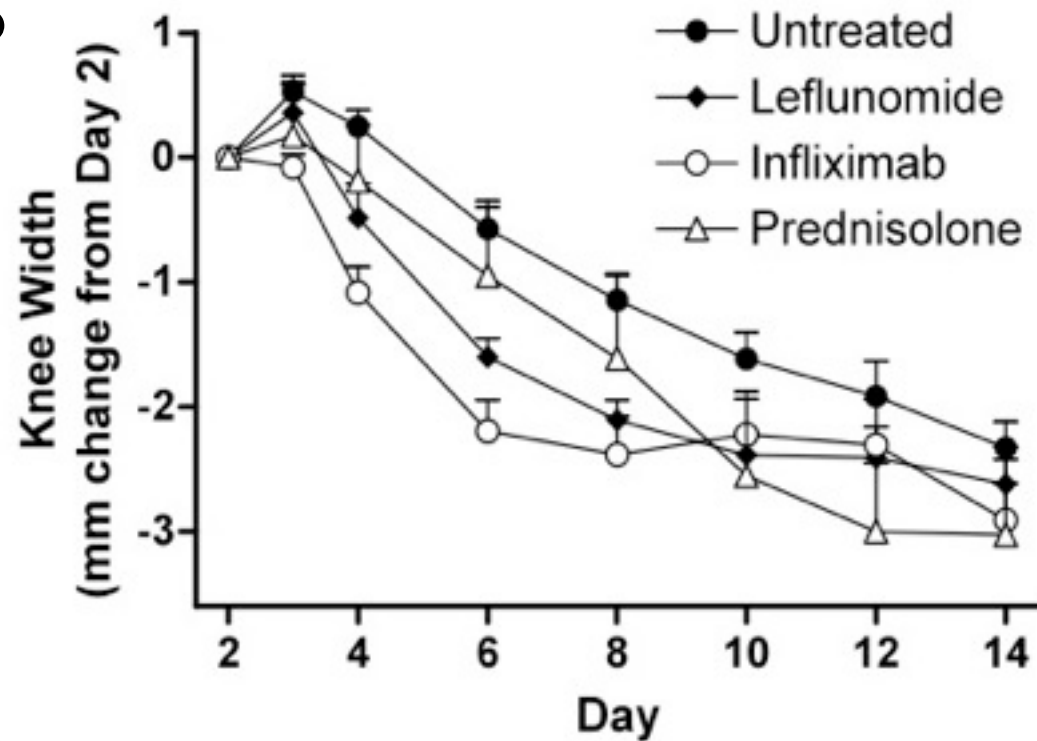**C**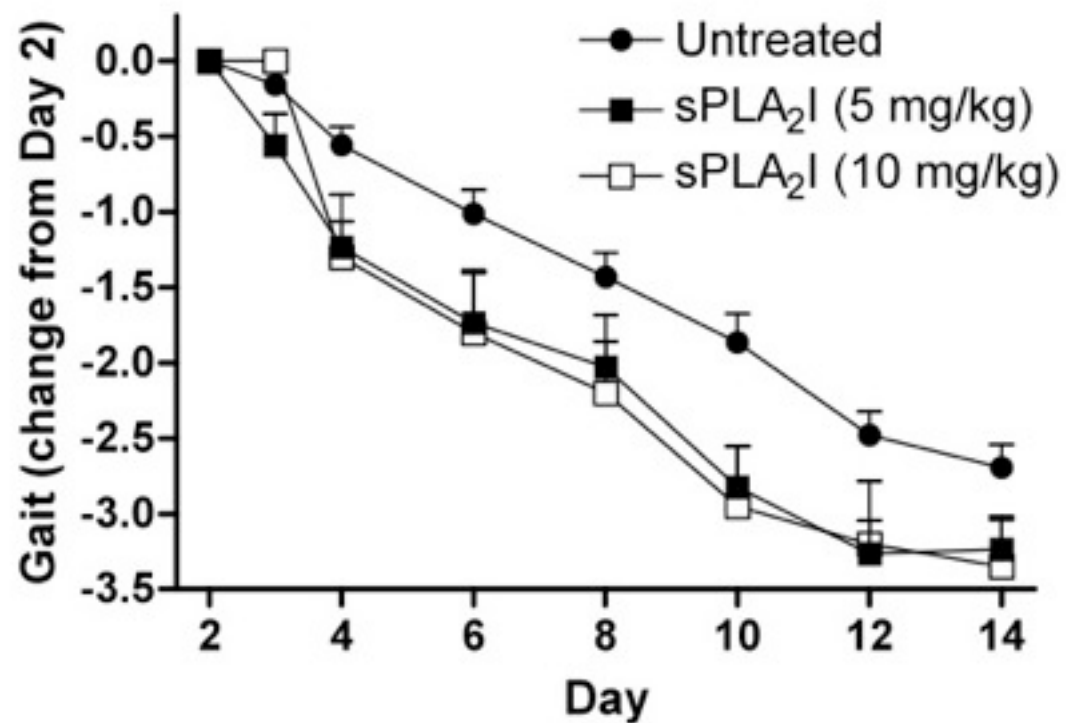**D**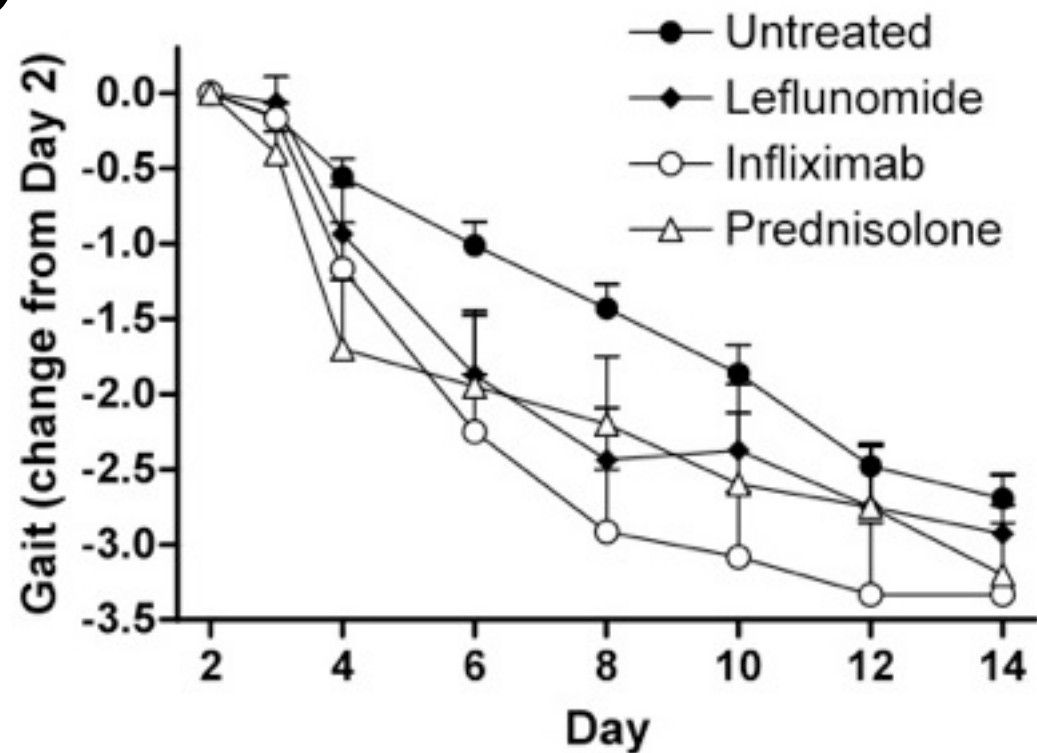

Supplement: MOESM3 [file 9693608]
